# Supplementary material for: Conceptual framework and uncertainty analysis for large-scale, species-agnostic modelling of landscape connectivity across Alberta, Canada
Source: PubMed Central journal article supplement (PMC7176682; doi:10.1038/s41598-020-63545-z), 2020-04-22
Supplement: 41598_2020_63545_MOESM1_ESM.pdf [file 41598_2020_63545_MOESM1_ESM.pdf]

## APPENDIX 1

### Conceptual framework and uncertainty analysis for large-scale, species-agnostic modelling of landscape connectivity across Alberta, Canada

**Authors:** Ronan MARREC<sup>1,2\*</sup>, Hossam E. ABDEL MONIEM<sup>2,3,4</sup>, Majid IRAVANI<sup>5</sup>, Branko HRICKO<sup>5</sup>, Jahan KARIYEVA<sup>5</sup>, Helene H. WAGNER<sup>2</sup>

#### Affiliations:

<sup>1</sup> EDYSAN (*Ecologie et Dynamique des Systèmes Anthropisés*) UMR 7058 CNRS-Université de Picardie Jules Verne, 33 rue Saint Leu, F-80039 Amiens, France

<sup>2</sup> Department of Ecology and Evolutionary Biology, University of Toronto, Canada

<sup>3</sup> Centre for Urban Environments, University of Toronto Mississauga, Canada

<sup>4</sup> Department of Zoology, Faculty of Science, Suez Canal University, Ismailia, Egypt

<sup>5</sup> Alberta Biodiversity Monitoring Institute, University of Alberta, Canada

\*Correspondence and requests for materials should be addressed to R.M. (e-mail: [ronan.marrec@u-picardie.fr](mailto:ronan.marrec@u-picardie.fr))

**Appendix 1** List of human footprint (HF) categories considered in the study, listed following the levels of classification proposed by the Conservation Measures Partnership framework<sup>84</sup>. For each HF is given its degree of footprint ( $H_F$ ) and intensity of human use ( $H_U$ ) values.

Distinction was made between the forest- (FD) and agriculture-dominated (AD) areas for Alberta's HF only.

| Human modification activities framework       |                                 |                                                                         | FD area     |       | AD area |       |      |
|-----------------------------------------------|---------------------------------|-------------------------------------------------------------------------|-------------|-------|---------|-------|------|
| Level 1                                       | Level 2                         | HF category                                                             | $H_F$       | $H_U$ | $H_F$   | $H_U$ |      |
| <b>Alberta</b>                                |                                 |                                                                         |             |       |         |       |      |
| <b>Residential and commercial development</b> | Housing and urban areas         | Clearing (residence)                                                    | 0.75        | 1     | 0.75    | 1     |      |
|                                               |                                 | Rural residence                                                         | 0.5         | 0.5   | 0.5     | 0.5   |      |
|                                               |                                 | Country residence                                                       | 0.5         | 0.65  | 0.5     | 0.65  |      |
|                                               |                                 | Urban residence                                                         | 1           | 1     | 1       | 1     |      |
|                                               | Commercial and industrial areas | Clearing (unknown)                                                      | 0.6         | 0     | 0.5     | 0     |      |
|                                               |                                 | Clearing (well pad)                                                     | 0.6         | 0.2   | 0.5     | 0.2   |      |
|                                               |                                 | Industrial facility                                                     | 1           | 1     | 1       | 1     |      |
|                                               |                                 | Tourism and recreation areas                                            | Green space | 0.25  | 0.5     | 0.25  | 0.5  |
|                                               |                                 |                                                                         | Runway      | 0.5   | 0.3     | 0.5   | 0.3  |
|                                               | Surrounding vegetation          |                                                                         | 0.5         | 0.5   | 0.5     | 0.5   |      |
|                                               | Agriculture and aquaculture     | Annual and perennial non-timber crops<br>Livestock farming and ranching | Recreation  | 0.25  | 0.25    | 0.35  | 0.25 |
|                                               |                                 |                                                                         | Campground  | 0.5   | 0.5     | 0.5   | 0.5  |
|                                               |                                 |                                                                         | Golf course | 0.6   | 0.5     | 0.65  | 0.5  |
| Crop                                          |                                 |                                                                         | 0.75        | 0.25  | 0.85    | 0.25  |      |
| CFO                                           |                                 |                                                                         | 1           | 1     | 1       | 1     |      |
|                                               |                                 | Rough pasture                                                           | 0.25        | 0.25  | 0.35    | 0.25  |      |

|                                                     |                         |                                       |                                        |      |     |      |     |
|-----------------------------------------------------|-------------------------|---------------------------------------|----------------------------------------|------|-----|------|-----|
| <b>Energy<br/>production and<br/>mining</b>         | Oil and gas drilling    | Tame pasture                          | 0.6                                    | 0.25 | 0.7 | 0.25 |     |
|                                                     |                         | Oil sand mine                         | 1                                      | 1    | 1   | 1    |     |
|                                                     |                         | Gas well                              | 0.9                                    | 0.25 | 0.8 | 0.25 |     |
|                                                     |                         | Oil well                              | 0.4                                    | 0.25 | 0.8 | 0.25 |     |
|                                                     | Mining and quarrying    | Gravel/sand/coal mine (> 15<br>years) | Gravel/sand/coal mine (> 15<br>years)  | 0.5  | 0.5 | 0.5  | 0.5 |
|                                                     |                         |                                       | Gravel/sand/coal mine (15-10<br>years) | 0.8  | 0.8 | 0.8  | 0.8 |
|                                                     |                         |                                       | Gravel/sand/coal mine (< 10<br>years)  | 1    | 1   | 1    | 1   |
|                                                     |                         | Pit lake                              | 1                                      | 0.1  | 1   | 0.1  |     |
|                                                     |                         | Peat                                  | 0.8                                    | 1    | 0.8 | 1    |     |
|                                                     |                         | Mine (RIS)                            | 1                                      | 1    | 1   | 1    |     |
|                                                     |                         | Well (RIS)                            | 1                                      | 1    | 1   | 1    |     |
|                                                     |                         | Well active                           | 0.4                                    | 0.25 | 0.8 | 0.25 |     |
|                                                     |                         | Well abandoned                        | 0.1                                    | 0    | 0.2 | 0    |     |
|                                                     |                         | Renewable energy                      | Windmill                               | 1    | 0.1 | 1    | 0.1 |
| <b>Transportation<br/>and service<br/>corridors</b> | Roads and railroads     | Gravel road                           | 0.8                                    | 0.75 | 0.8 | 0.75 |     |
|                                                     |                         | Unpaved road                          | 0.7                                    | 0.3  | 0.7 | 0.3  |     |
|                                                     |                         | Winter access road                    | 0.4                                    | 0.2  | 0.4 | 0.2  |     |
|                                                     |                         | Trail                                 | 0.1                                    | 0.2  | 0.2 | 0.3  |     |
|                                                     |                         | Paved road                            | 1                                      | 1    | 1   | 1    |     |
|                                                     |                         | Unimproved road                       | 0.4                                    | 0.25 | 0.5 | 0.3  |     |
|                                                     |                         | Abandoned railway                     | 0.6                                    | 0    | 0.6 | 0    |     |
|                                                     |                         | Single track railway                  | 0.9                                    | 0.25 | 0.9 | 0.25 |     |
|                                                     |                         | Double track railway                  | 0.9                                    | 0.4  | 0.9 | 0.4  |     |
|                                                     |                         | Multiple railway and spur             | 0.9                                    | 0.6  | 0.9 | 0.6  |     |
| Utility and service lines                           | Transmission line (RIS) | 1                                     | 1                                      | 1    | 1   |      |     |

|                                   |                                        |                             |      |      |      |      |
|-----------------------------------|----------------------------------------|-----------------------------|------|------|------|------|
|                                   |                                        | Transmission line           | 0.3  | 0.25 | 0.6  | 0.1  |
|                                   |                                        | Pipeline                    | 0.65 | 0.65 | 0.65 | 0.65 |
|                                   |                                        | Pipeline (RIS)              | 1    | 1    | 1    | 1    |
|                                   |                                        | Low-impact seismic line     | 0    | 0.1  | 0.1  | 0    |
|                                   |                                        | Pre-low-impact seismic line | 0    | 0.1  | 0.6  | 0.1  |
|                                   |                                        | Seismic line trail          | 0.1  | 0.1  | 0.25 | 0.2  |
|                                   | Logging and wood harvesting            | Cut block (> 15 years)      | 0    | 0    | 0    | 0    |
|                                   |                                        | Cut block (15-4 years)      | 0.6  | 0.5  | 0.6  | 0.5  |
|                                   |                                        | Cut block (< 4 years)       | 1    | 0.7  | 1    | 0.7  |
|                                   | Dams and water management/use          | Reservoir                   | 1    | 0.25 | 1    | 0.25 |
|                                   |                                        | Canal                       | 1    | 0.1  | 1    | 0.15 |
|                                   | Other ecosystem modifications          | Borrow pit dry              | 0.8  | 0.1  | 0.8  | 0.1  |
|                                   |                                        | Borrow pit wet              | 1    | 0.1  | 1    | 0.1  |
|                                   |                                        | Dugout                      | 1    | 0.25 | 1    | 0.25 |
|                                   |                                        | Borrow pit (RIS)            | 1    | 1    | 1    | 1    |
|                                   |                                        | Railway/road verge          | 0.5  | 0.1  | 0.5  | 0.1  |
|                                   |                                        | Disturbed vegetation        | 0.7  | 0.5  | 0.7  | 0.5  |
|                                   |                                        | Windrow (RIS)               | 1    | 1    | 1    | 1    |
| <b>Pollution</b>                  | Household sewage and urban waste water | Lagoon                      | 1    | 0.15 | 1    | 0.15 |
|                                   | Industrial and military effluents      | Sump                        | 1    | 0.2  | 1    | 0.2  |
|                                   |                                        | Tailing pond                | 1    | 0.5  | 1    | 0.5  |
|                                   |                                        | Tailing pond (RIS)          | 1    | 1    | 1    | 1    |
|                                   | Garbage and solid waste                | Landfill                    | 1    | 1    | 1    | 1    |
|                                   |                                        | Transfer station            | 1    | 0.45 | 1    | 0.45 |
|                                   |                                        | Mine wastes                 | 1    | 1    | 1    | 1    |
| <b>Canada outside of Alberta</b>  |                                        |                             |      |      |      |      |
| <b>Transportation and service</b> | Roads and railroads                    | Gravel road                 | 0.8  | 0.75 | -    | -    |
|                                   |                                        | Unpaved road                | 0.7  | 0.3  | -    | -    |

|                                             |                                       |                              |      |      |   |   |
|---------------------------------------------|---------------------------------------|------------------------------|------|------|---|---|
| <b>corridors</b>                            |                                       | Winter access road           | 0.4  | 0.2  | - | - |
|                                             |                                       | Paved road                   | 1    | 1    | - | - |
|                                             |                                       | Railway                      | 0.9  | 0.5  | - | - |
| <b>Agriculture and aquaculture</b>          | Annual and perennial non-timber crops | Crop                         | 0.75 | 0.25 | - | - |
|                                             | Livestock farming and ranching        | Tame pasture                 | 0.6  | 0.25 | - | - |
| <b>Other</b>                                | Mixed use development                 | Settlement                   | 0.75 | 0.8  | - | - |
| <b>USA</b>                                  |                                       |                              |      |      |   |   |
| <b>Transportation and service corridors</b> | Roads and railroads                   | Gravel road                  | 0.8  | 0.75 | - | - |
|                                             |                                       | Paved road                   | 1    | 1    | - | - |
|                                             |                                       | Railway                      | 0.9  | 0.5  | - | - |
| <b>Agriculture and aquaculture</b>          | Annual and perennial non-timber crops | Crop                         | 0.5  | 0.4  | - | - |
|                                             | Livestock farming and ranching        | Rough pasture                | 1    | 1    | - | - |
|                                             |                                       | Tame pasture                 | 0.5  | 0.65 | - | - |
| <b>Other</b>                                | Mixed use development                 | Disturbed vegetation         | 0.5  | 0.5  | - | - |
|                                             |                                       | Development high intensity   | 0.75 | 0.25 | - | - |
|                                             |                                       | Development medium intensity | 0.25 | 0.25 | - | - |
|                                             |                                       | Development low intensity    | 0.6  | 0.25 | - | - |

RIS: Reclamation Information System data obtained from the Government of Alberta, Alberta Environment and Parks. These land uses are found in the oil-sand region surrounding Fort McMurray and considered as more intensive than similar land uses elsewhere in Alberta.
